# Supplementary material
Source: publisher figshare collection journal article supplement (https://acs.figshare.com/ndownloader/files/4029493)
Supplement: Supplementary file 1 [file 4029493]

Supporting Information for:

# Stepwise Filtering of the Internal Layers of Dendrimers by Transverse Relaxation-Edited NMR

Luiz F. Pinto, Ricardo Riguera,\* and Eduardo Fernandez-Megia\*

Department of Organic Chemistry and Center for Research in Biological Chemistry and Molecular Materials (CIQUS), University of Santiago de Compostela, Jenaro de la Fuente s/n, 15782 Santiago de Compostela, Spain.

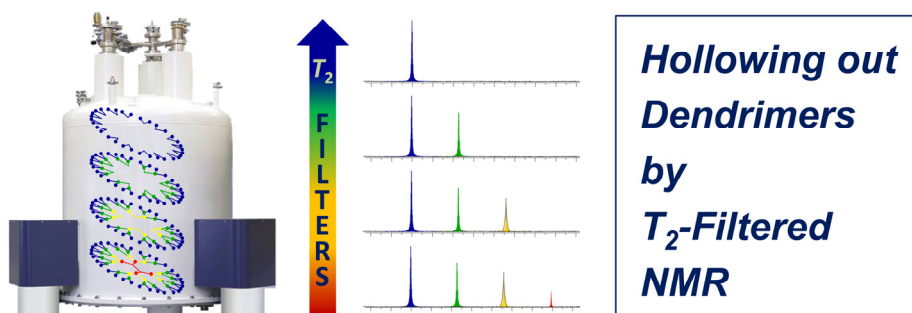

## **Table of Contents**

|                                                         |     |
|---------------------------------------------------------|-----|
| 1. Materials                                            | S3  |
| 2. Preparation of G4 PPI-ibuprofen and characterization | S4  |
| 3. NMR spectroscopy                                     | S6  |
| 4. Figures S3-S6                                        | S7  |
| 5. References                                           | S11 |

## 1. Materials

G4 Poly(amido amine) (PAMAM) with 64 primary amine end groups was purchased as a 10 wt% solution in MeOH from Sigma-Aldrich. G4 poly(propylene imine) (PPI) dendrimer with 32 primary amine end groups was purchased from Symo-Chem. G2 P-dendrimer carrying 24 aldehyde end groups was kindly gifted by Prof. Jean-Pierre Majoral (CNRS, Toulouse, France). G2 and G3 Fréchet-type poly(aryl ether) dendrimers incorporating a 1,1,1-tris(4'-hydroxyphenyl)ethane core were synthesized following a modified procedure of that reported by Yamazaki and co-workers,<sup>1</sup> incorporating extra purification steps by flash chromatography (230-400 mesh silica gel) after chlorination step [ $\text{CH}_2\text{Cl}_2$ :hexane, 3:2 (G2), 3:1 (G3)] and coupling to 3,5-dihydroxybenzyl alcohol [ $\text{CH}_2\text{Cl}_2$ :hexane 25:1 (G2); gradient  $\text{CH}_2\text{Cl}_2$ :hexane 50:1 to 100:1 (G3)]. G4 PPI-TEG was synthesized as previously described by the groups of Ford and Zhu.<sup>2</sup> Partially acetylated G4 PAMAM dendrimer (70% by  $^1\text{H}$  NMR) was prepared according to previous literature procedures.<sup>3</sup> 2-[2-(2-methoxyethoxy)ethoxy]acetic acid, 1-hydroxybenzotriazole hydrate (HOBt), ibuprofen, *N*-(3-dimethylaminopropyl)-*N'*-ethylcarbodiimide hydrochloride (EDC), 1,1,1-tris(4'-hydroxyphenyl)ethane, 3,5-dihydroxybenzyl alcohol, benzyl chloride, tetramethylammonium hydroxide pentahydrate, and acetic anhydride were purchased from Sigma-Aldrich. Thionyl chloride was purchased from Across Organics.  $\text{CH}_2\text{Cl}_2$  and  $\text{Et}_3\text{N}$  were distilled from  $\text{CaH}_2$ . 1-Methyl-2-pyrrolidinone, DMF, toluene, and MeOH were dried over molecular sieves.  $\text{K}_2\text{CO}_3$  was dried under reduced pressure at 65 °C overnight. Ultrafiltration was performed on stirred cells with Amicon YM1 membranes.

## 2. Preparation of G4 PPI-ibuprofen and characterization

Ibuprofen (125 mg, 0.606 mmol, 1.5 eq. relative to  $\text{NH}_2$  groups), EDC (116 mg, 0.605 mmol), and HOBt (82 mg, 0.607 mmol) were dissolved in dry  $\text{CH}_2\text{Cl}_2$  (2 mL) and stirred at rt for 30 min under Ar. Then, G4 PPI (44 mg, 0.401 mmol, 32 terminal  $\text{NH}_2$  groups) was dissolved in dry  $\text{CH}_2\text{Cl}_2$  and added to the reaction mixture. After 72 h of stirring at rt, the solvent was evaporated and the crude product was dissolved in EtOAc and washed with  $\text{H}_2\text{O}$  (3 x 50 mL), 0.5 M HCl (3 x 50 mL), 1 M NaOH (3 x 50 mL), and  $\text{H}_2\text{O}$  (3 x 50 mL). The organic phase was dried over  $\text{MgSO}_4$  and concentrated under reduced pressure to give a crude product that was purified by ultrafiltration (Amicon YM1, acetone 6 x 30 mL) to give G4 PPI-ibuprofen (92 mg, 77 %).  $^1\text{H}$  NMR (500 MHz,  $\text{CDCl}_3$ )  $\delta$ : 7.20 (br s, 64H), 7.02 (br s, 64H), 3.60 (br s, 32H), 3.13 (br s, 64H), 2.49-2.24 (m, 178H), 1.80 (br s, 34H), 1.44 (br s, 160H), 0.86 (br s, 192H);  $^{13}\text{C}$  NMR (75 MHz,  $\text{CDCl}_3$ )  $\delta$ : 175.1, 140.2, 139.2, 129.3, 127.3, 52.2, 51.2, 46.3, 45.1, 37.9, 30.3, 26.8, 22.5, 18.8; MALDI-TOF MS (dithranol, linear mode,  $m/z$ ): 9538. Calcd. for  $[\text{M}+\text{H}]^+$ ,  $\text{C}_{600}\text{H}_{945}\text{N}_{62}\text{O}_{32}$ : 9539.

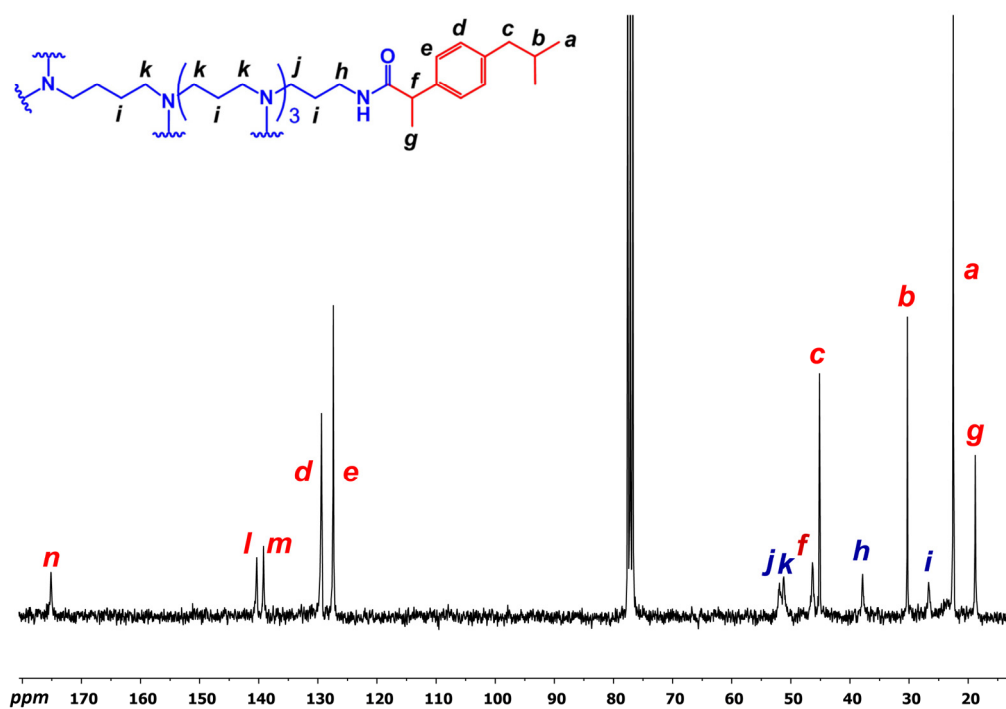

**Figure S1.**  $^{13}\text{C}$  NMR spectrum of G4 PPI-ibuprofen (75 MHz,  $\text{CDCl}_3$ )

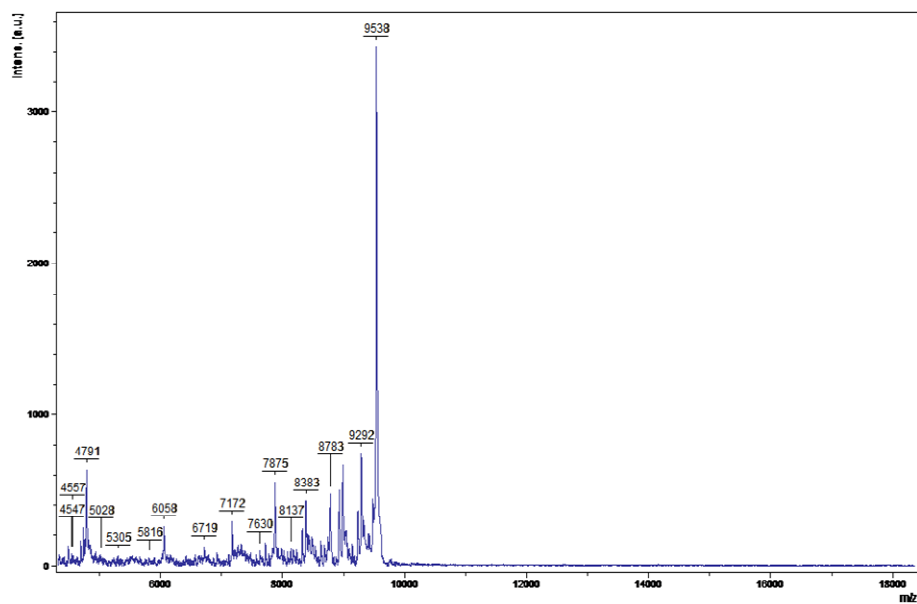

**Figure S2.** MALDI-TOF MS of G4 PPI-ibuprofen

### 3. NMR spectroscopy

NMR experiments were recorded at DRX-500 Bruker spectrometer of 11.7 T ( $^1\text{H}$  frequency 500 MHz,  $^{31}\text{P}$  frequency 202 MHz) equipped with an inverse detection  $^1\text{H}/\text{X}$  broad-band BBI probe with  $z$  gradients and operating under Topspin 1.3 software, and at Agilent Mercury-300 spectrometer of 7.0 T ( $^1\text{H}$  frequency 300 MHz,  $^{13}\text{C}$  frequency 75 MHz) equipped with an ATB direct detection X broad-band /  $^1\text{H}$  dual probe with  $z$  gradient and operating under VNMRJ 2.2D software.  $^1\text{H}$  NMR chemical shifts ( $\delta$ ) are reported in ppm relative to residual  $\text{CHCl}_3$  at 7.26 ppm or HOD at 4.79 ppm.  $^{13}\text{C}$  NMR  $\delta$  are reported in ppm using  $\text{CDCl}_3$  as reference at 77.0 ppm. 1D and 2D  $T_2$ -edited experiments were performed by replacing the first  $90^\circ$  pulse by a Carr-Purcell-Meiboom-Gill (CPMG) pulse sequence as previously described<sup>4,5</sup> using a  $\tau$  value of 0.7 ms. A dendrimer concentration of 0.5 mM was set for all  $^1\text{H}$   $T_2$ -filtered experiments including COSY (except for PPI-TEG where a 1% wt solution was used for comparison purposes with ref 2).  $T_2$ -filtered  $^{13}\text{C}$  NMR for G2 poly(aryl ether) dendrimer was done at 2 mM.  $T_2$ -filtered  $^1\text{H}$ - $^{13}\text{C}$  HSQC for PPI-ibuprofen was recorded at 8 mM. *Mestrelab* software (*Mestrelab Research*) was used for spectra processing and OriginPro7.5 (*Originlab*) to perform the exponential fittings to obtain  $T_2$  relaxation times.

$^1\text{H}$   $T_2$  relaxation experiments were acquired at DRX-500 and Mercury-300 spectrometer at 298 K.  $T_2$  values were determined by means of the CPMG pulse sequence using 16 different echo durations ( $t$ ), with a minimum value of 1.4 ms and a maximum of about 6 to 7 times the highest  $T_2$  in the sample. The delay between  $180^\circ$  pulses in the CPMG block was 1.4 ms ( $\tau = 0.7$  ms), the number of scans was set at 32, and the interscan relaxation delay ( $d_1$ ) was 18 s.  $T_2$  relaxation times were determined by fitting the absolute signal integrals or intensities ( $I$ ) at each  $t$  to the monoexponential eq. S1:

$$I(t)/I_0 = \exp(-t/T_2) \quad \text{eq. S1}$$

where,  $I(t)$  and  $I_0$  are the observed signal integrals or intensities at a given value of  $t$  and at  $t$  equal to 0, respectively. The  $t$  dependence of the absolute integrals or intensities for all  $^1\text{H}$  resonances analyzed showed monoexponential magnetization decays.

#### 4. Figures S3-S6

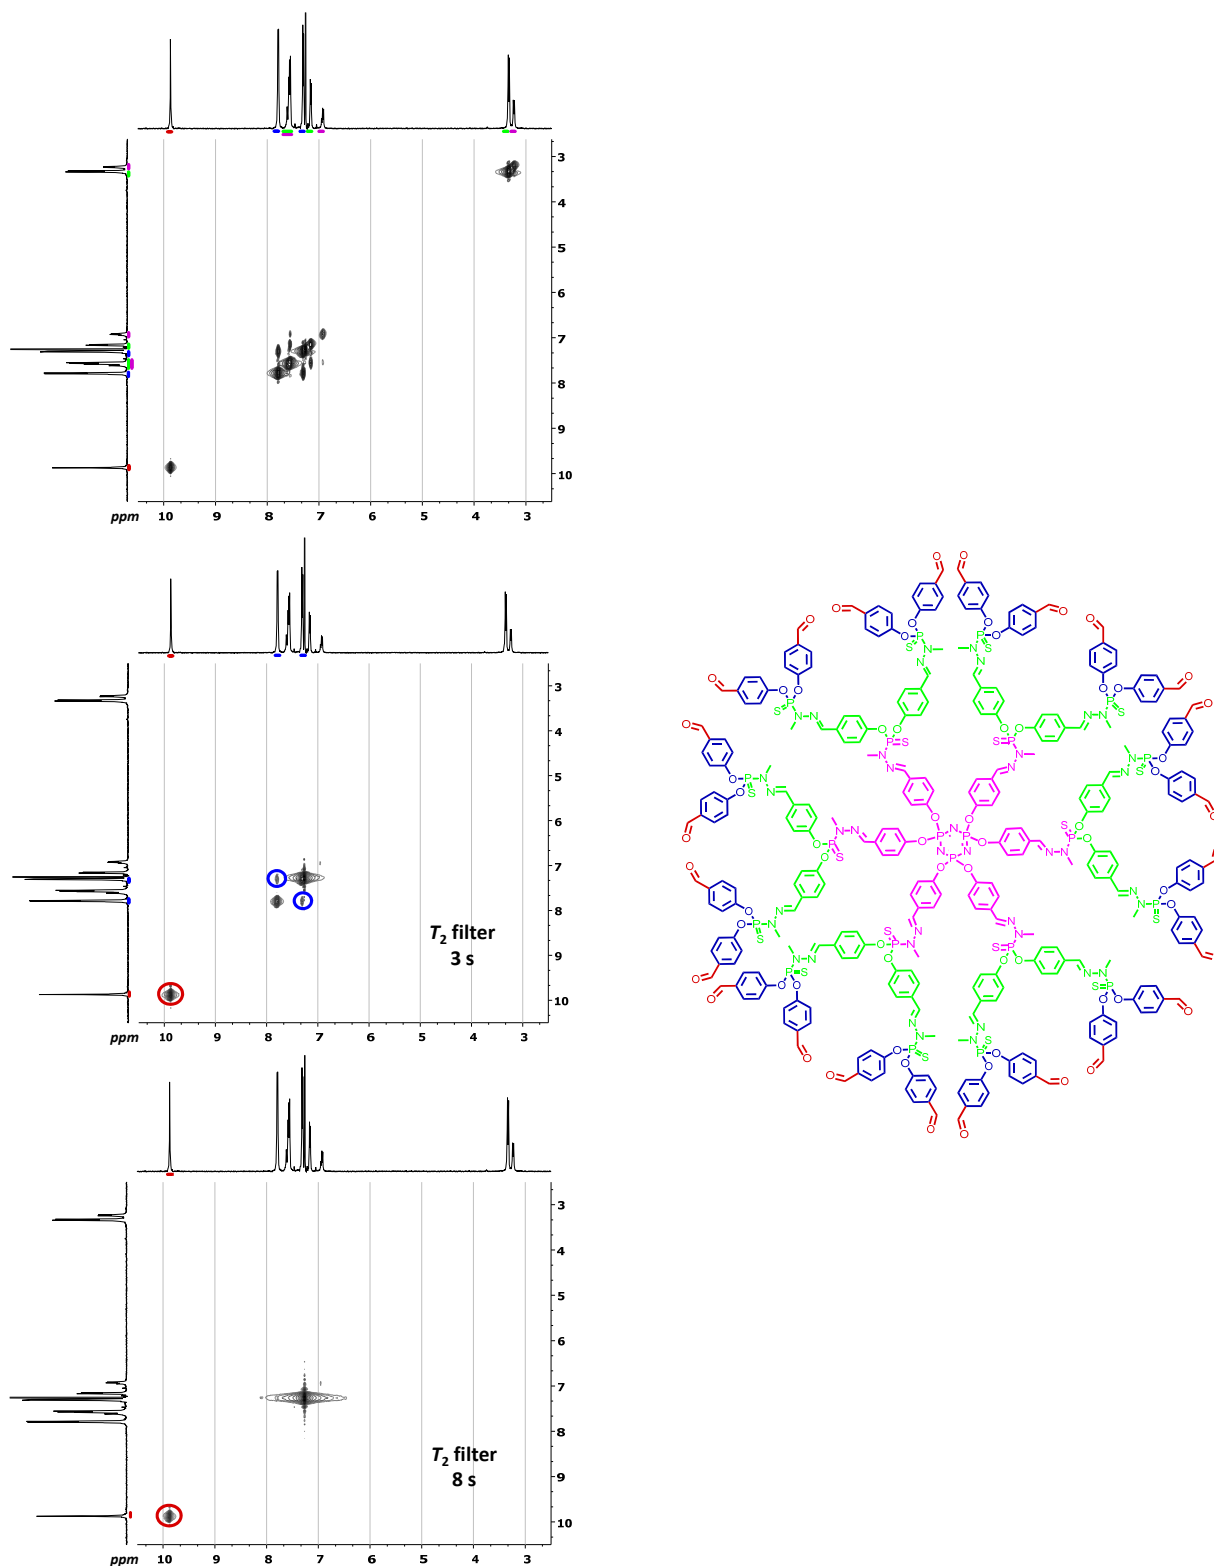

**Figure S3.** Structure of G2 P-dendrimer and  $T_2$ -filtered COSY spectra showing in blue circles the most peripheral aromatic cross-peaks (500 MHz,  $\text{CDCl}_3$ , 298 K).

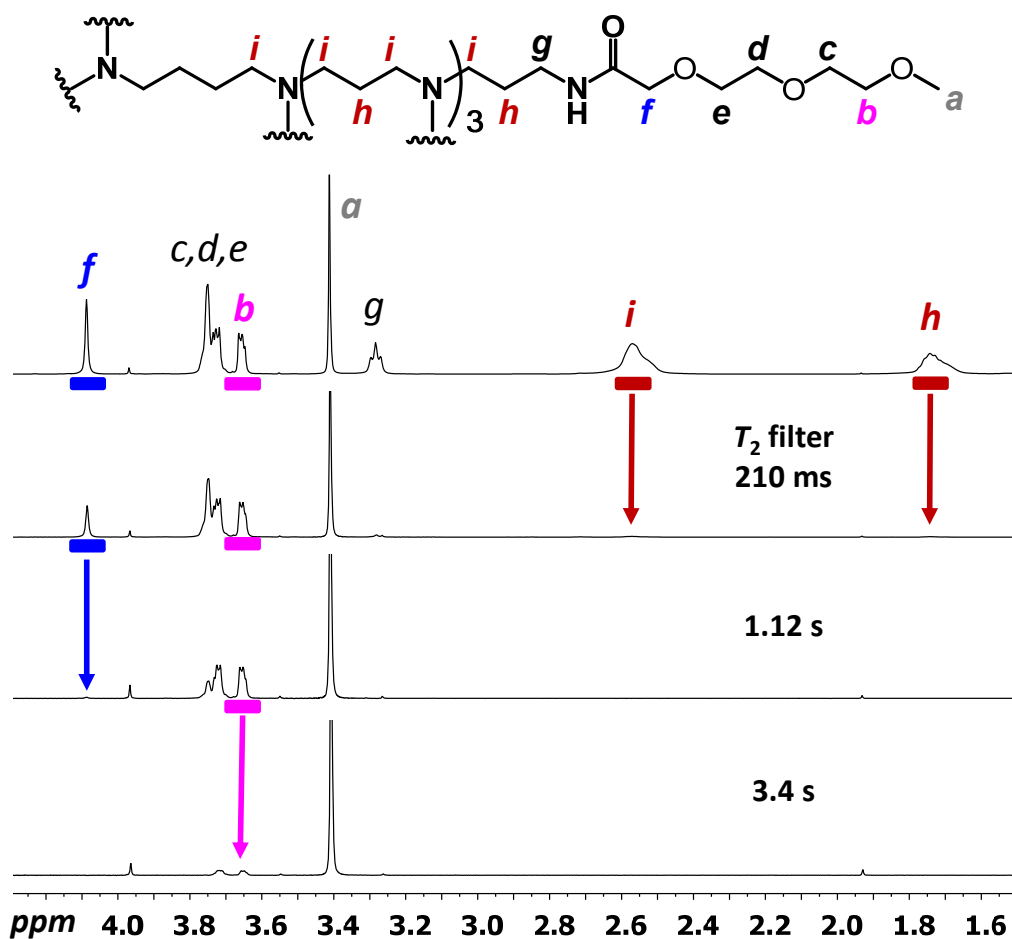

**Figure S4.** Structure of G4 PPI-TEG and  $^1\text{H}$   $T_2$ -filtered NMR spectra (500 MHz, 1 wt.% in  $\text{D}_2\text{O}$ , 298 K).



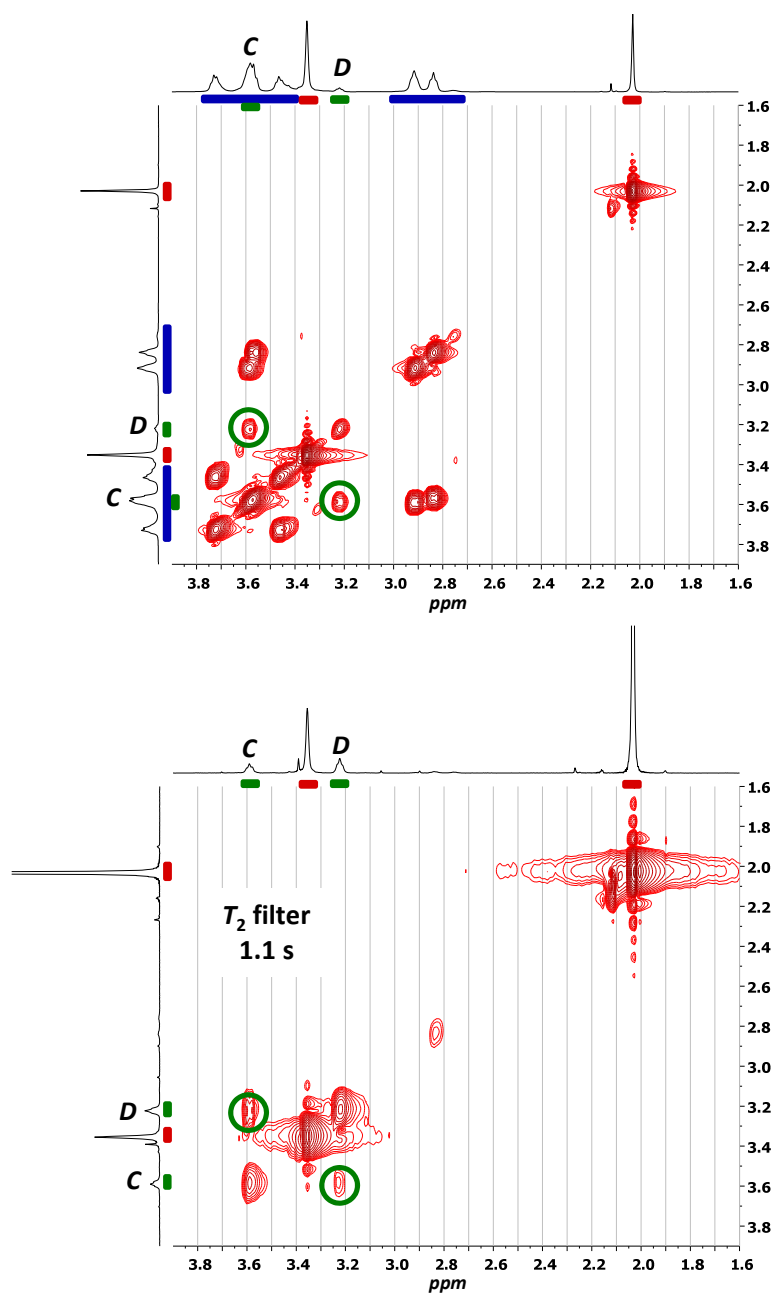

**Figure S5.**  $T_2$ -filtered COSY of partially acetylated G4 PAMAM (500 MHz,  $D_2O$ , pD 3.8, 298 K).

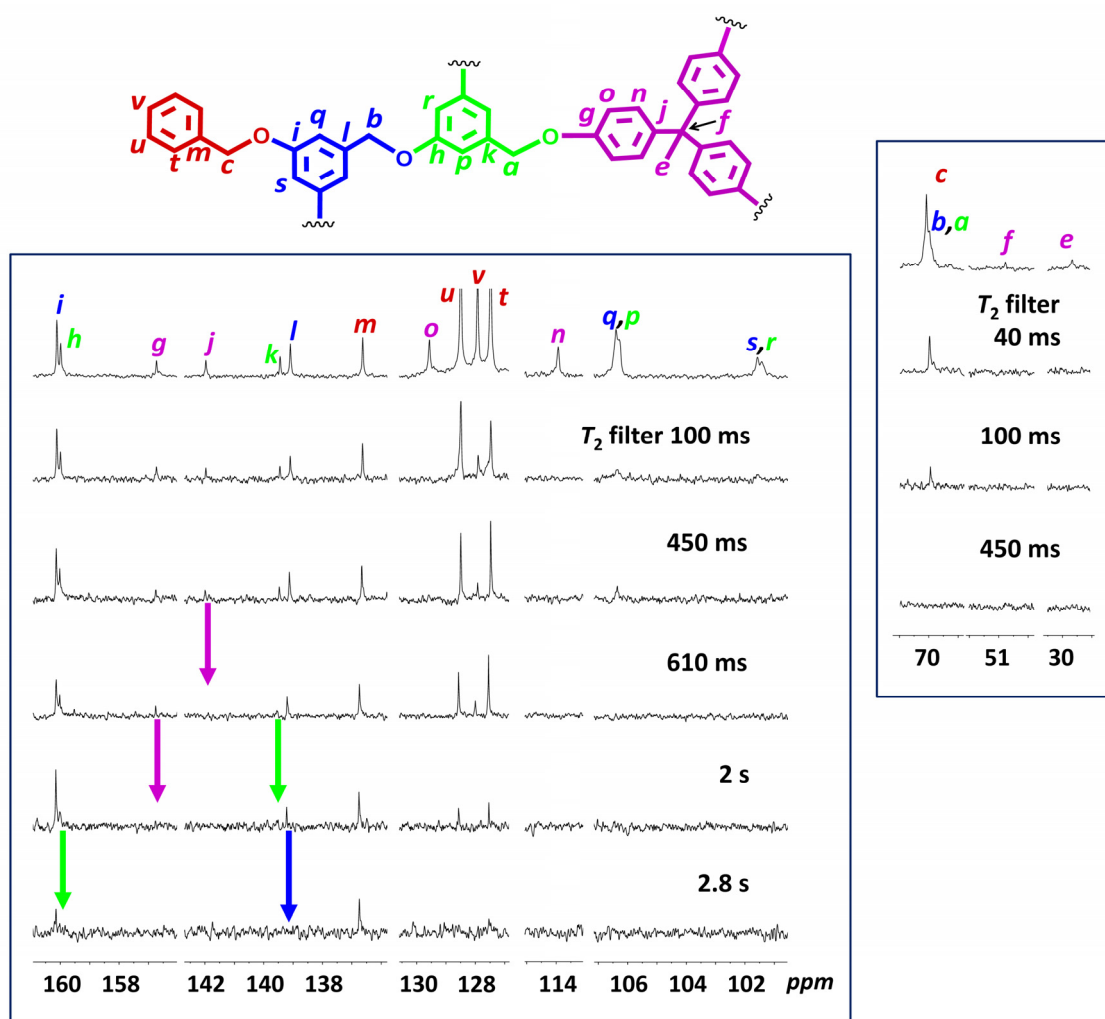

**Figure S6.**  $^{13}\text{C}$   $T_2$ -filtered NMR spectra of aromatic and aliphatic carbons in G2 poly(aryl ether) dendrimer (75 MHz,  $\text{CDCl}_3$ , 298 K). The stepwise suppression of the  $^{13}\text{C}$  resonances is illustrated with arrows for the quaternary aromatic signals.

## 5. References

---

- 1 Yamazaki, N.; Washio, I.; Shibasaki, Y.; Ueda, M. *Org. Lett.* **2006**, 8, 2321.
- 2 (a) Baille, W. E.; Malveau, C.; Zhu, X. X.; Kim, Y. H.; Ford, W. T. *Macromolecules* **2003**, 36, 839.  
(b) Kreider, J. L.; Ford, W. T. *J. Polym. Sci., Part A: Polym. Chem.* **2001**, 39, 821.
- 3 Majoros, I. J.; Keszler, B.; Woehler, S.; Bull, T.; Baker Jr., J. R. *Macromolecules* **2003**, 36, 5526.
- 4 (a) Meiboom, S.; Gill, D. *Rev. Sci. Instrum.* **1958**, 29, 688. (b) Carr, H. Y.; Purcell, E. M. *Phys. Rev.* **1954**, 94, 630.
- 5 Williams, P. G.; Saunders, J. K.; Dyne, M.; Mountford, C. E.; Holmes, K. T. *Magn. Reson. Med.* **1988**, 7, 463.
